# Supplementary material
Source: publisher site journal article supplement (https://www.spandidos-publications.com/5378/downloadSupplementary)

Figure S1. Kaplan-Meier survival curves for S100A9 expression in The Cancer Genome Atlas-hepatocellular carcinoma dataset. HR, hazard ratio; S100A9, S100 calcium binding protein A9; TPM, transcripts per million.

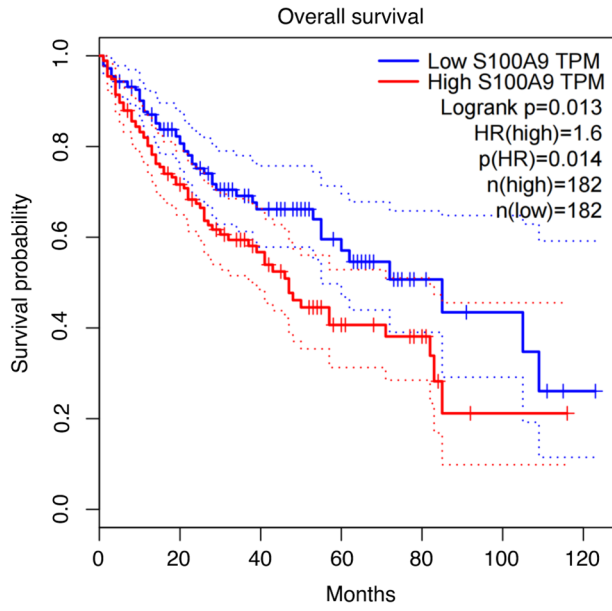

Figure S2. Reverse transcription-quantitative PCR analysis of ADAMTS16 and BMP2. Verification of (A) ADAMTS16-OE and (B) BMP2-OE in HepG2 cells. The relative gene expression in the control group was set as 1 for quantification. The data were analyzed using an unpaired Student's t-test. Data are presented as the mean  $\pm$  SD. \* $P < 0.05$ . ADAMTS16, a metalloproteinase domain with thrombospondin motifs 16; BMP2, bone morphogenetic protein 2; OE, overexpression.

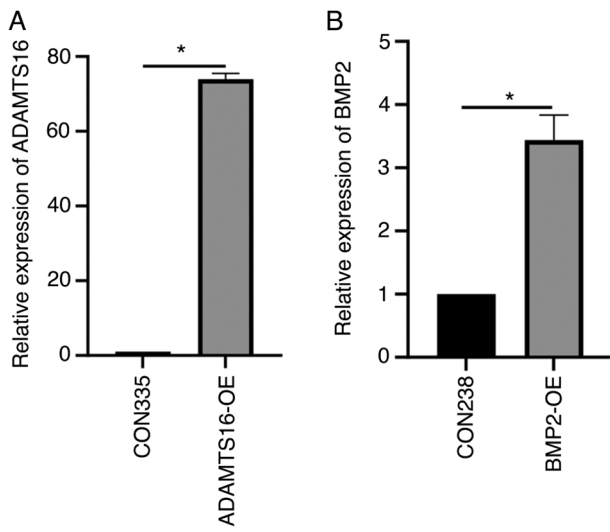

Supplement: Supplementary file 1 [file downloadSupplementary]
